# Supplementary material for: Comparative analysis of differential network modularity in tissue specific normal and cancer protein interaction networks
Source: PubMed Central journal article supplement (PMC3852839; doi:10.1186/2043-9113-3-19), 2013-10-06
Supplement: 2043-9113-3-19-S3.pdf [file 2043-9113-3-19-S3.pdf]

**Table 1- Molecular Cluster number difference between normal and cancer condition**

| Tissue          | Normal | Cancer      |
|-----------------|--------|-------------|
| Bone            | 15     | 19          |
| Breast          | 22     | 28          |
| Colon           | 22     | 27          |
| Kidney          | 21     | 30          |
| Liver           | 19     | 28          |
| <i>p</i> -value |        | 0.024658652 |

**Table 2- Interaction number difference of overlapping modules between normal and cancer condition**

| Tissue          | Normal | Cancer     |
|-----------------|--------|------------|
| Breast          | 5      | 3          |
| Colon           | 5      | 5          |
| Kidney          | 9      | 2          |
| Liver           | 4      | 1          |
| <i>p</i> -value |        | 0.07873529 |
